# Supplementary material for: Fluorescent columnar bis(boron difluoride) complexes derived from tetraketonates
Source: Royal Society of Chemistry journal article supplement (doi:10.1039/c7tc01425b), 2017-01-01
Supplement: c7tc01425b1.pdf [file c7tc01425b1.pdf]

## Fluorescent columnar bis(borondifluoride) complexes derived from tetraketones

Ya-Wen Chen, Yen-Chun Lin, Hsiu-Ming Kuo, Chung K. Lai

Department of Chemistry  
National Central University  
Chung-Li, Taiwan, ROC

Supporting Information

### 1. Experimental Section

#### **(2Z,4Z)-3,4-Dihydroxy-1,6-bis(4-(hexyloxy)phenyl)hexa-2,4-diene-1,6-dione 2a (n = 6)**

Yield 66%; mp 127.0 °C. <sup>1</sup>H NMR (300 MHz, CDCl<sub>3</sub>): δ 0.89 (t, 6H, -CH<sub>3</sub>, *J* = 6.4 Hz), 1.31–1.82 (m, 16H, -CH<sub>2</sub>), 4.02 (t, 4H, -OCH<sub>2</sub>, *J* = 6.6 Hz), 6.95 (d, 4H, Ar-H, *J* = 9.0 Hz), 7.05 (s, 2H, -CCHCO), 7.99 (d, 4H, Ar-H, *J* = 8.7 Hz), 15.76 (s, 2H, -OH). <sup>13</sup>C NMR (75 MHz, CDCl<sub>3</sub>): δ 14.01, 22.56, 25.63, 29.03, 31.51, 68.36, 95.06, 114.54, 128.09, 130.23, 163.73, 172.45, 190.81. MS (HRFAB, *m/z*): calcd: 494.2668. Found: 494.2665 [M<sup>+</sup>].

#### **(2Z,4Z)-3,4-Dihydroxy-1,6-bis(4-(decyloxy)phenyl)hexa-2,4-diene-1,6-dione 2a (n = 10)**

Yield 67%; mp 118.0 °C. <sup>1</sup>H NMR (300 MHz, CDCl<sub>3</sub>): δ 0.86 (t, 6H, -CH<sub>3</sub>, *J* = 6.6 Hz), 1.26–1.84 (m, 32H, -CH<sub>2</sub>), 4.02 (t, 4H, -OCH<sub>2</sub>, *J* = 6.6 Hz), 6.95 (d, 4H, Ar-H, *J* = 9.0 Hz), 7.06 (s, 2H, -CCHCO), 7.99 (d, 4H, Ar-H, *J* = 8.7 Hz), 15.76 (s, 2H, -OH). <sup>13</sup>C NMR (75 MHz, CDCl<sub>3</sub>): δ 14.01, 22.67, 25.96, 29.07, 29.33, 29.54, 31.88, 68.39, 95.07, 114.56, 128.12, 130.24, 163.75, 172.49, 190.83. MS (HRFAB, *m/z*): calcd: 606.3920. Found: 606.3928 [M<sup>+</sup>].

#### **(2Z,4Z)-3,4-Dihydroxy-1,6-bis(4-(dodecyloxy)phenyl)hexa-2,4-diene-1,6-dione 2a (n = 12)**

Yield 65%; mp 118.0 °C. <sup>1</sup>H NMR (300 MHz, CDCl<sub>3</sub>): δ 0.86 (t, 6H, -CH<sub>3</sub>, *J* = 6.0 Hz), 1.25–1.82 (m, 40H, -CH<sub>2</sub>), 4.02 (t, 4H, -OCH<sub>2</sub>, *J* = 6.3 Hz), 6.95 (d, 4H, Ar-H, *J* = 9.0 Hz), 7.05 (s, 2H, -CCHCO), 7.99 (d, 4H, Ar-H, *J* = 8.7 Hz), 15.76 (s, 2H, -OH). <sup>13</sup>C NMR (75 MHz, CDCl<sub>3</sub>): δ 14.11, 22.68, 25.95, 29.06, 29.34, 29.56, 29.63, 31.90, 68.36, 95.05, 114.53,

128.09, 130.23, 163.73, 172.44, 190.82. MS (HRFAB, m/z): calcd: 662.4546. Found: 662.4555 [M<sup>+</sup>].

**(2Z,4Z)-3,4-Dihydroxy-1,6-bis(4-(tetradecyloxy)phenyl)hexa-2,4-diene-1,6-dione**

**2a (n = 14)**

Yellow solids. Yield 70%; mp 119.0 °C. <sup>1</sup>H NMR (300 MHz, CDCl<sub>3</sub>): δ 0.86 (t, 6H, -CH<sub>3</sub>, *J* = 6.0 Hz), 1.24–1.82 (m, 48H, -CH<sub>2</sub>), 4.02 (t, 4H, -OCH<sub>2</sub>, *J* = 6.6 Hz), 6.95 (d, 4H, Ar-H, *J* = 8.7 Hz), 7.05 (s, 2H, -CCHCO), 7.99 (d, 4H, Ar-H, *J* = 9.0 Hz), 15.76 (s, 2H, -OH). <sup>13</sup>C NMR (75 MHz, CDCl<sub>3</sub>): δ 14.11, 22.69, 25.96, 29.08, 29.35, 29.57, 29.66, 31.92, 68.39, 95.07, 114.57, 130.24, 163.76, 205.97. MS (HRFAB, m/z): calcd: 718.5172. Found: 719.5231 [M+H]<sup>+</sup>.

**(2Z,4Z)-1,6-Bis(3,4-bis(hexyloxy)phenyl)-3,4-dihydroxyhexa-2,4-diene-1,6-dione**

**2b (n = 6)**

Yellow powder. Yield 68%; mp 119.0 °C. <sup>1</sup>H NMR (300 MHz, CDCl<sub>3</sub>): δ 0.89 (t, 12H, -CH<sub>3</sub>, *J* = 7.0 Hz), 1.23–1.50 (m, 24H, -CH<sub>2</sub>), 1.79–1.89 (m, 8H, -CH<sub>2</sub>), 4.04–4.09 (m, 8H, -OCH<sub>2</sub>), 6.89 (d, 2H, Ar-H, *J* = 8.6 Hz), 7.05 (s, 2H, -CCHCO), 7.55 (sd, 2H, Ar-H, <sup>4</sup>*J* = 2.0 Hz), 7.63 (dd, 2H, Ar-H, <sup>3</sup>*J* = 8.5 Hz, <sup>4</sup>*J* = 2.0 Hz), 15.75 (s, 2H, -OH). <sup>13</sup>C NMR (75 MHz, CDCl<sub>3</sub>): δ 14.00, 22.59, 22.62, 25.67, 28.97, 29.11, 31.53, 69.08, 69.31, 95.26, 111.82, 112.07, 122.75, 128.37, 149.07, 154.16, 171.87, 191.18. MS (HRFAB, m/z): calcd: 694.4445. Found: 694.4449 [M<sup>+</sup>].

**(2Z,4Z)-1,6-Bis(3,4-bis(dodecyloxy)phenyl)-3,4-dihydroxyhexa-2,4-diene-1,6-dione**

**2b (n = 12)**

Yellow powder. Yield 65%; mp 115.0 °C. <sup>1</sup>H NMR (300 MHz, CDCl<sub>3</sub>): δ 0.86 (m, 12H, -CH<sub>3</sub>, *J* = 6.6 Hz), 1.24–1.47 (m, 72H, -CH<sub>2</sub>), 1.82–1.86 (m, 8H, -CH<sub>2</sub>), 4.04–4.08 (m, 8H, -OCH<sub>2</sub>), 6.89 (d, 2H, Ar-H, *J* = 8.7 Hz), 7.05 (s, 2H, -CCHCO), 7.55 (sd, 2H, Ar-H, <sup>4</sup>*J* = 2.1 Hz), 7.63 (dd, 2H, Ar-H, <sup>3</sup>*J* = 8.6 Hz, <sup>4</sup>*J* = 2.0 Hz), 15.75 (s, 2H, -OH). <sup>13</sup>C NMR (75 MHz, CDCl<sub>3</sub>): δ 14.10, 22.68, 25.59, 25.94, 25.99, 28.99, 29.14, 29.35, 29.60, 31.91, 67.96, 69.07, 69.30, 95.24, 111.83, 112.08, 122.73, 128.35, 149.06, 154.15, 171.86, 191.16. MS (HRFAB,

m/z): calcd: 1030.8201. Found: 1030.8210 [M<sup>+</sup>].

**(2Z,4Z)-3,4-Dihydroxy-1,6-bis(3,4,5-tributoxyphenyl)hexa-2,4-diene-1,6-dione 2c (n = 4)**

Yellow powder. Yield 66%; mp 113.0 °C. <sup>1</sup>H NMR (500 MHz, CDCl<sub>3</sub>): δ 0.93–0.99 (m, 18H, –CH<sub>3</sub>), 1.48–1.53 (m, 12H, –CH<sub>2</sub>), 1.69–1.75 (m, 4H, –CH<sub>2</sub>), 1.78–1.83 (m, 8H, –CH<sub>2</sub>), 4.03–4.07 (m, 12H, –OCH<sub>2</sub>), 7.03 (s, 2H, –CCHCO), 7.22 (s, 4H, Ar–H), 15.76 (s, 2H, –OH). <sup>13</sup>C NMR (125 MHz, CDCl<sub>3</sub>): δ 13.80, 19.11, 19.25, 31.38, 32.34, 69.13, 73.29, 95.35, 106.73, 130.36, 143.58, 153.23, 173.01, 191.04. MS (HRFAB, m/z): calcd: 726.4343. Found: 726.4350 [M<sup>+</sup>].

**(2Z,4Z)-3,4-Dihydroxy-1,6-bis(3,4,5-tris(dodecyloxy)phenyl)hexa-2,4-diene-1,6-dione 2c (n = 12)**

Yellow powder. Yield 61%; mp 61.0 °C. <sup>1</sup>H NMR (500 MHz, CDCl<sub>3</sub>): δ 0.86 (t, 18H, –CH<sub>3</sub>, *J* = 6.9 Hz), 1.25–1.50 (m, 108H, –CH<sub>2</sub>), 1.70–1.76 (m, 4H, –CH<sub>2</sub>), 1.79–1.84 (m, 8H, –CH<sub>2</sub>), 4.02–4.06 (m, 12H, –OCH<sub>2</sub>), 7.02 (s, 2H, –CCHCO), 7.22 (s, 4H, Ar–H), 15.77 (s, 2H, –OH). <sup>13</sup>C NMR (125 MHz, CDCl<sub>3</sub>): δ 14.08, 22.68, 26.05, 26.10, 29.36, 29.55, 29.63, 29.70, 30.37, 31.93, 69.48, 73.69, 95.36, 106.77, 130.36, 143.62, 153.23, 173.04, 191.05. MS (HRFAB): calcd: 1399.1855. Found: 1399.1866 [M<sup>+</sup>].

## 2. Single Crystal Data

**Table S1.** Bond lengths [Å] and angles [°] crystal **2a** (n = 6) and **1a** (n = 14)

Crystal **2a** (n = 6)

Bond distances

|           |            |           |            |
|-----------|------------|-----------|------------|
| O(1)-C(1) | 1.3230(15) | O(2)-C(3) | 1.2628(14) |
| C(1)-C(2) | 1.3582(18) | C(2)-C(3) | 1.4360(18) |
| C(1)-C(1) | 1.479(2)   |           |            |

Bond angles

|                |            |                |            |
|----------------|------------|----------------|------------|
| O(1)-C(1)-C(2) | 123.20(12) | O(1)-C(1)-C(1) | 114.65(14) |
| C(2)-C(1)-C(1) | 122.15(14) | C(1)-C(2)-C(3) | 120.12(11) |
| O(2)-C(3)-C(2) | 119.51(12) | O(2)-C(3)-C(4) | 118.66(11) |
| C(2)-C(3)-C(4) | 121.83(11) |                |            |

Crystal **1a** (n = 14)

Bond distances

|                |            |                |            |
|----------------|------------|----------------|------------|
| B(1)-F(2)      | 1.3546(14) | B(1)-F(1)      | 1.3584(13) |
| B(1)-O(1)      | 1.4707(13) | B(1)-O(2)      | 1.5029(12) |
| O(1)-C(1)      | 1.3042(12) | O(2)-C(3)      | 1.2930(12) |
| C(1)-C(2)      | 1.3600(13) | C(2)-C(3)      | 1.4097(14) |
| Bond angles    |            |                |            |
| F(2)-B(1)-F(1) | 111.11(9)  | F(2)-B(1)-O(1) | 109.69(9)  |
| F(1)-B(1)-O(1) | 109.14(9)  | F(2)-B(1)-O(2) | 108.21(9)  |
| F(1)-B(1)-O(2) | 108.02(8)  | O(1)-B(1)-O(2) | 110.66(8)  |
| C(1)-O(1)-B(1) | 120.94(8)  | C(3)-O(2)-B(1) | 123.75(8)  |
| O(1)-C(1)-C(2) | 124.12(9)  | C(1)-C(2)-C(3) | 118.94(9)  |
| O(2)-C(3)-C(2) | 119.53(9)  | O(2)-C(3)-C(4) | 116.56(8)  |

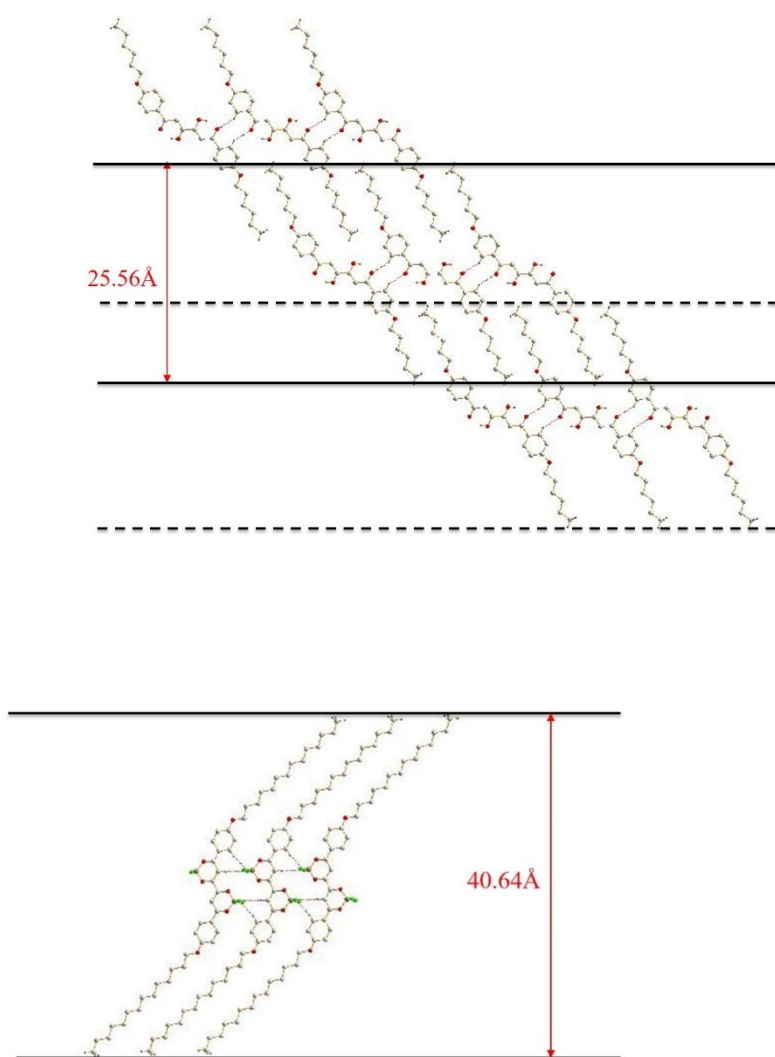

**Fig. S1** Layered structures formed in crystal lattice by crystal **2a** ( $n = 6$ , top plot) and **1a** ( $n = 14$ , bottom plot). Solid and dash line represent the neighboring layers in the crystal lattice. The distance between layers is 25.56 Å in **2a** and 40.64 Å in **1a**.

### 3. Bar Graph of Phase Behavior

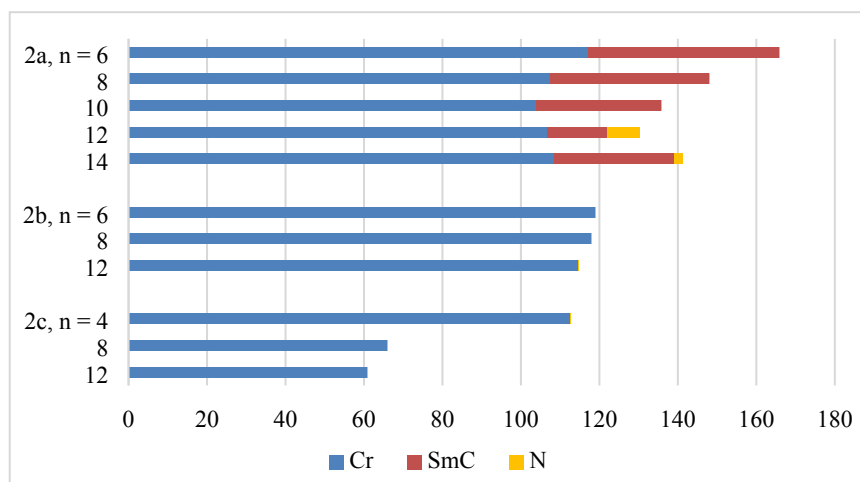

**Fig. S2** Bar graphs showing the phase behavior of compounds **2a–2c**. The temperatures of compounds **2a** ( $n = 6–14$ ) were taken from cooling process, and the temperatures of compounds **2b** ( $n = 6–12$ ) and **2c** ( $n = 4–12$ ) were taken from heating process.

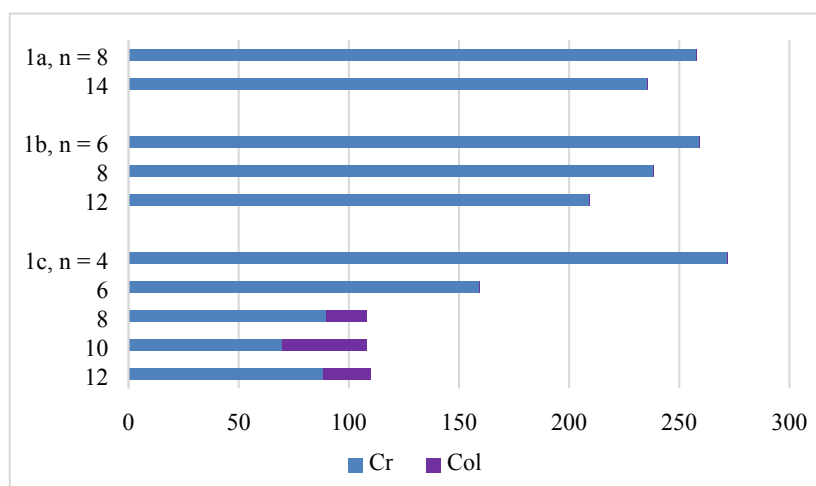

**Fig. S3** Bar graphs showing the phase behavior of compounds **1a–1c**. The temperatures of compounds **1a** ( $n = 8, 14$ ), **1b** ( $n = 6–12$ ) and **1c** ( $n = 4, 6$ ) were taken from heating process. The temperatures of compounds **1c** ( $n = 8–12$ ) were taken from cooling process.

## 4. TGA Analysis

**Table S2.** The decomposition temperature<sup>a</sup> of compounds **1a–2c** by TGA analysis

| Compd.            | T <sub>dec</sub> (°C) |
|-------------------|-----------------------|
| <b>2a</b> (n = 8) | 225.2                 |
| <b>2b</b> (n = 8) | 247.8                 |
| <b>2c</b> (n = 8) | 282.6                 |
| <b>1a</b> (n = 8) | 314.5                 |
| <b>1b</b> (n = 8) | 313.9                 |
| <b>1c</b> (n = 8) | 311.1                 |

<sup>a</sup>: Temperatures taken with a 5% weight loss.

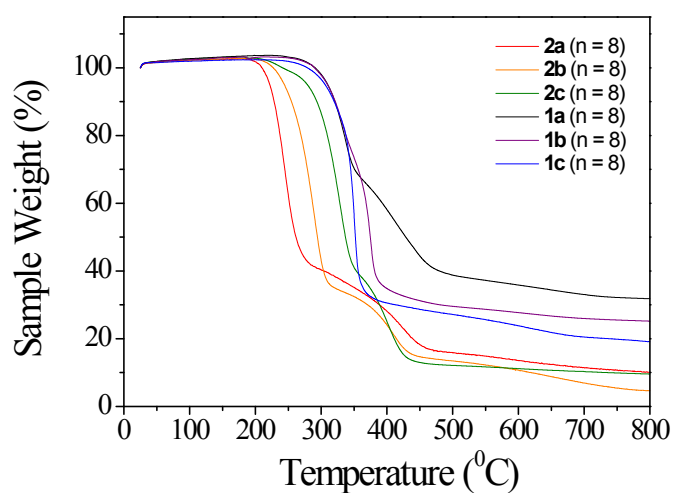

**Fig. S4** TGA thermograms of compounds **1a–2c** (all n = 8).

## 5. X-ray Diffraction Study

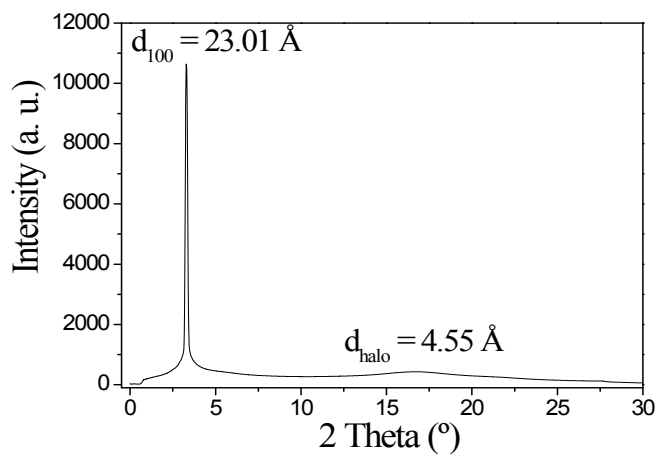

**Fig. S5** The powder X-ray diffraction plots of **1c** ( $n = 8$ ) at 99 °C.

## 6. Photophysical Property

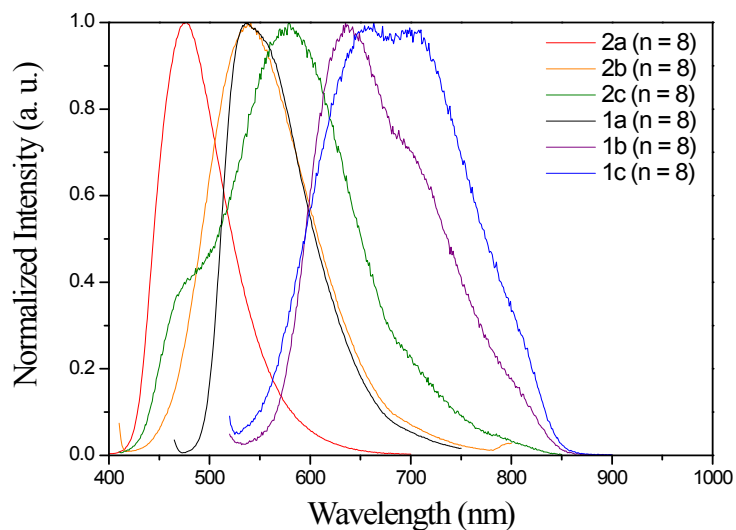

**Fig. S6** Normalized fluorescent spectra of compounds **1a–2c** ( $n = 8$ ). The PL spectra were excited at 459 nm (for **1a**,  $n = 8$ ), 502 nm (for **1b**,  $n = 8$ ), 497 nm (for **1c**,  $n = 8$ ), 377 nm (for **2a**,  $n = 8$ ), 401 nm (for **2b**,  $n = 8$ ) and 397 nm (for **2c**,  $n = 8$ ).

## 7. The $^1\text{H}$ and $^{13}\text{C}$ NMR Spectra of Compounds **1a-c**

<sup>1</sup>H-NMR spectrum of compound **1a** (n = 8)

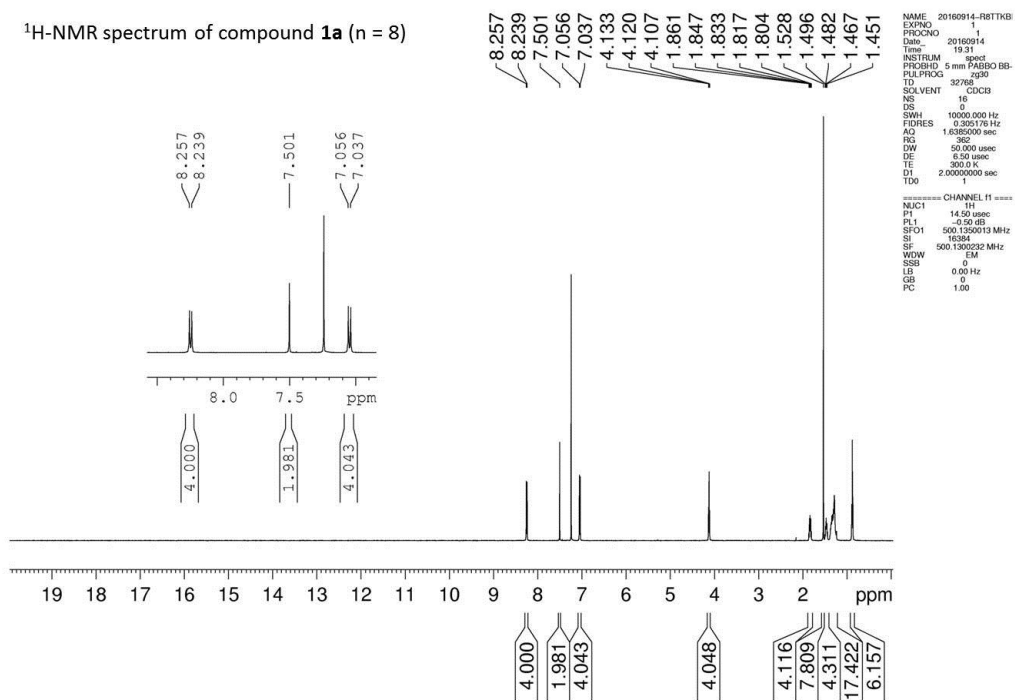

**Fig. S7** The <sup>1</sup>H-NMR spectrum of compound **1a** (n = 8).

<sup>13</sup>C-NMR spectrum of compound **1a** (n = 8)

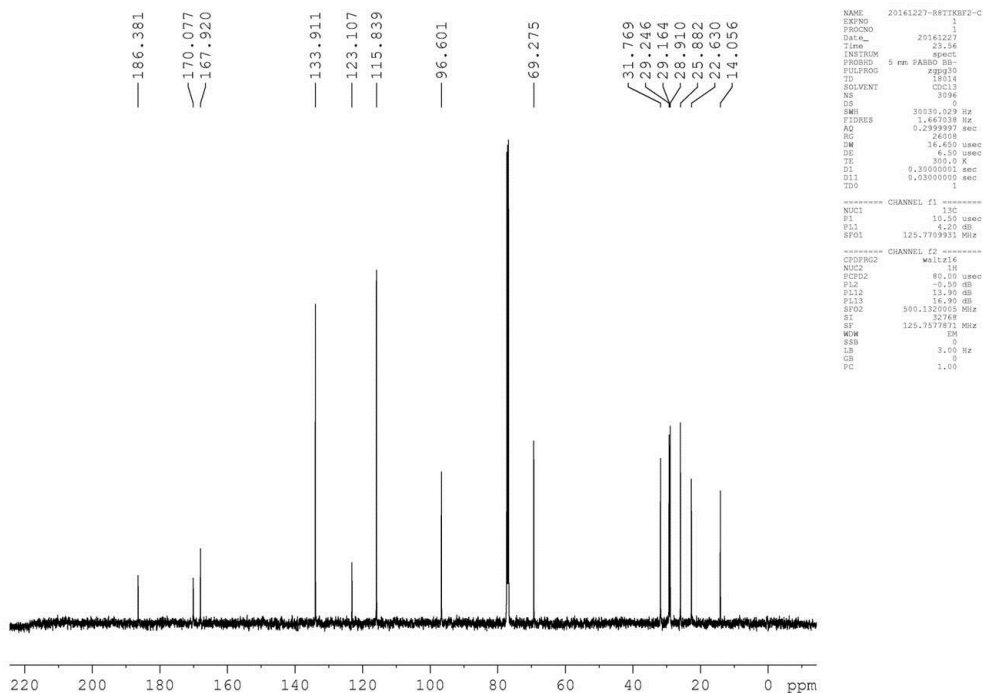

**Fig. S8** The <sup>13</sup>C-NMR spectrum of compound **1a** (n = 8).



<sup>1</sup>H-NMR spectrum of compound **1b** (n = 8)

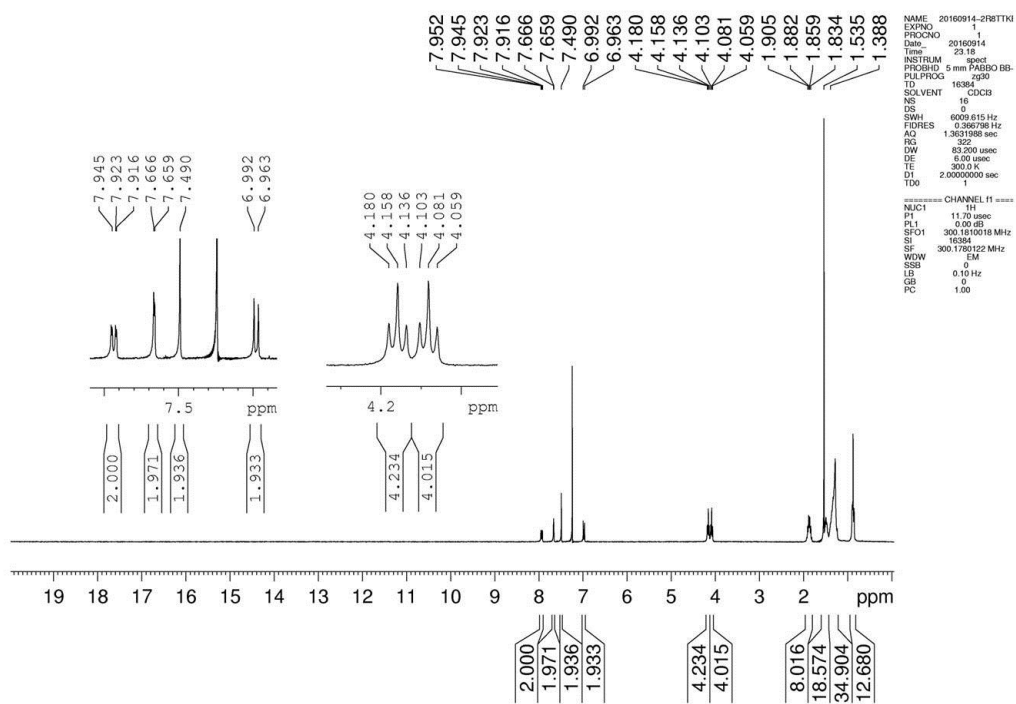

**Fig. S9** The <sup>1</sup>H-NMR spectrum of compound **1b** (n = 8).

<sup>13</sup>C-NMR spectrum of compound **1b** (n = 8)

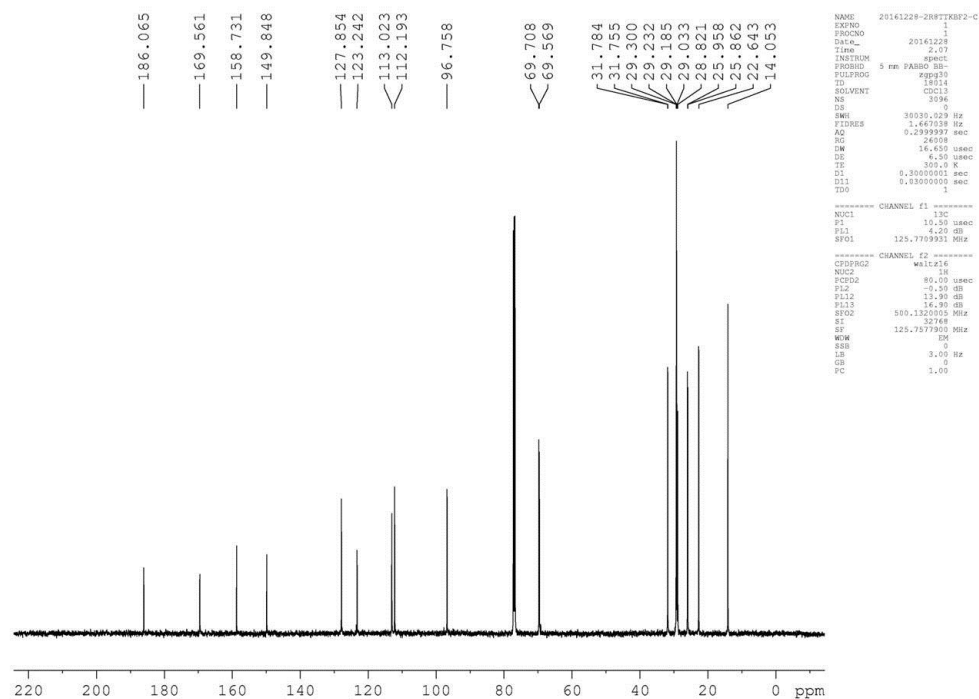

**Fig. S10** The <sup>13</sup>C-NMR spectrum of compound **1b** (n = 8).

<sup>1</sup>H-NMR spectrum of compound **1c** (n = 10)

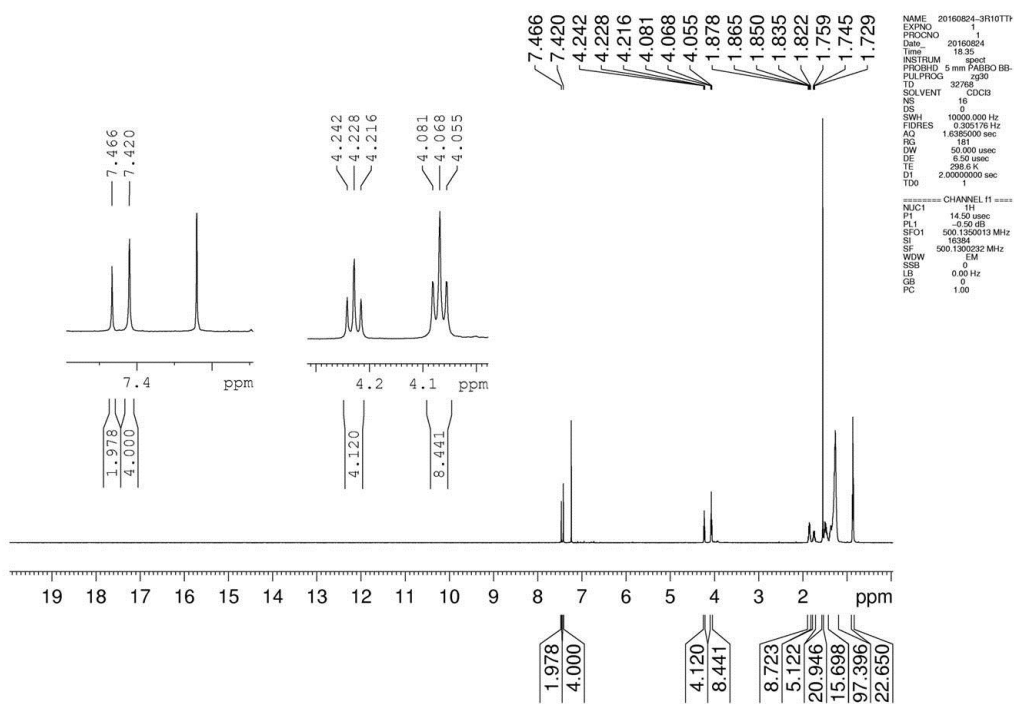

**Fig. S11** The <sup>1</sup>H-NMR spectrum of compound **1c** (n = 10).

<sup>13</sup>C-NMR spectrum of compound **1c** (n = 10)

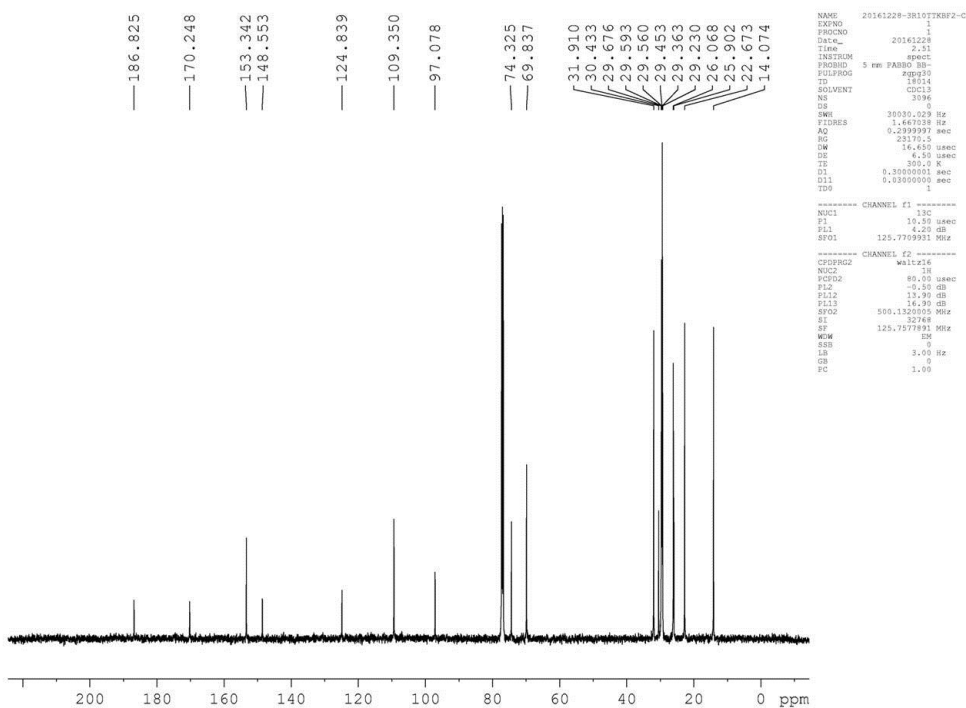

**Fig. S12** The <sup>13</sup>C-NMR spectrum of compound **1c** (n = 10).

## 8. DSC Thermographs of Compounds 1a–c

DSC curve of compound **1a** (n = 8)

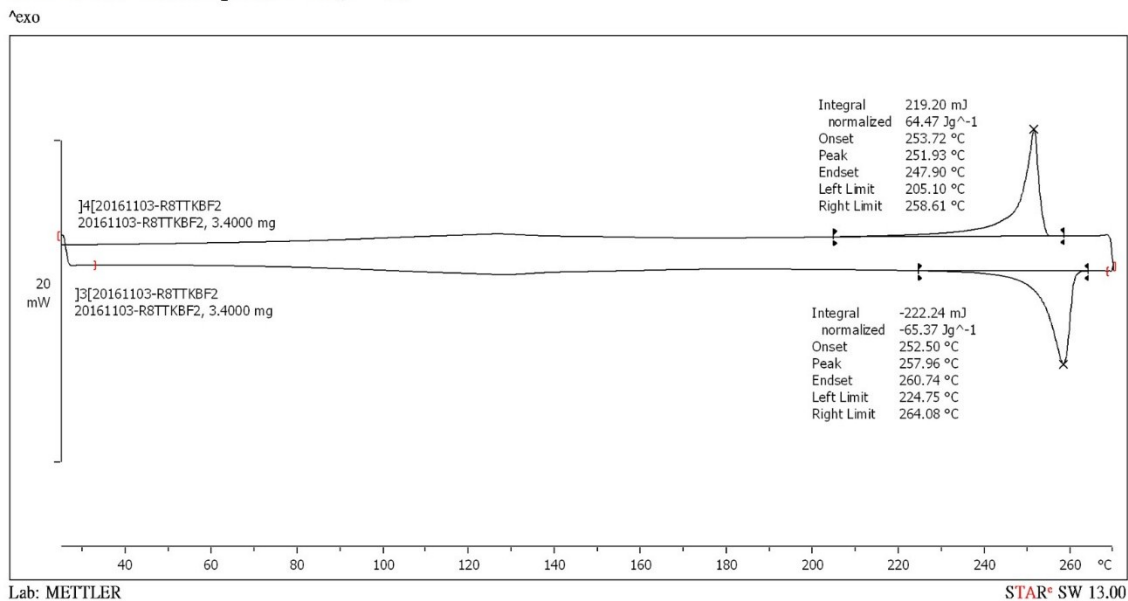

**Fig. S13** DSC thermograph of compound **1a** (n = 8).

DSC curve of compound **1b** (n = 8)

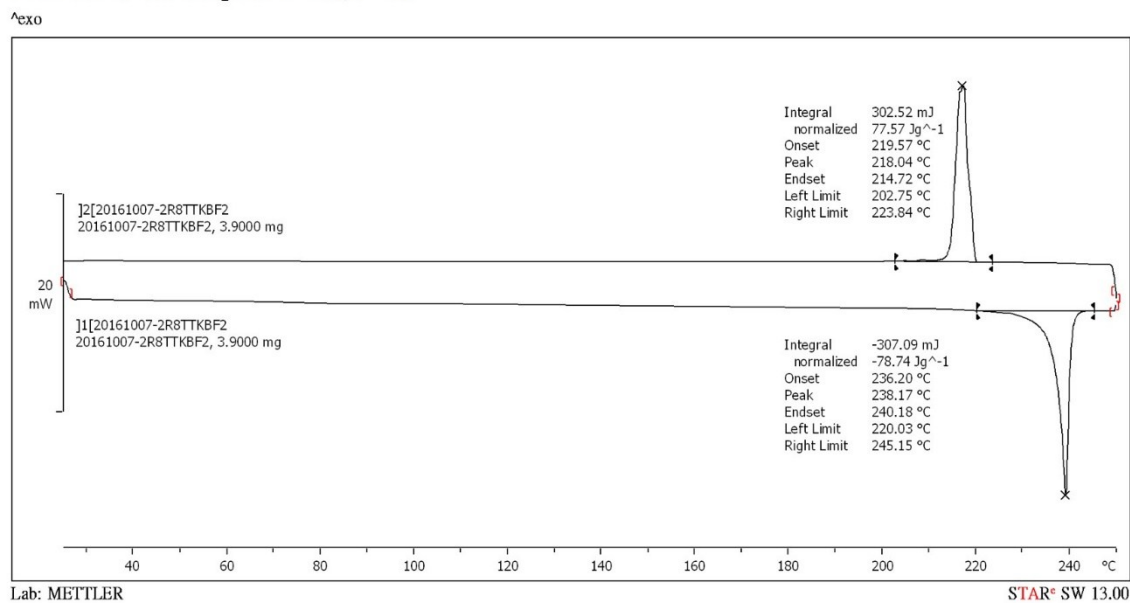

**Fig. S14** DSC thermograph of compound **1b** (n = 8).

# DSC curve of compound **1c** (n = 8)

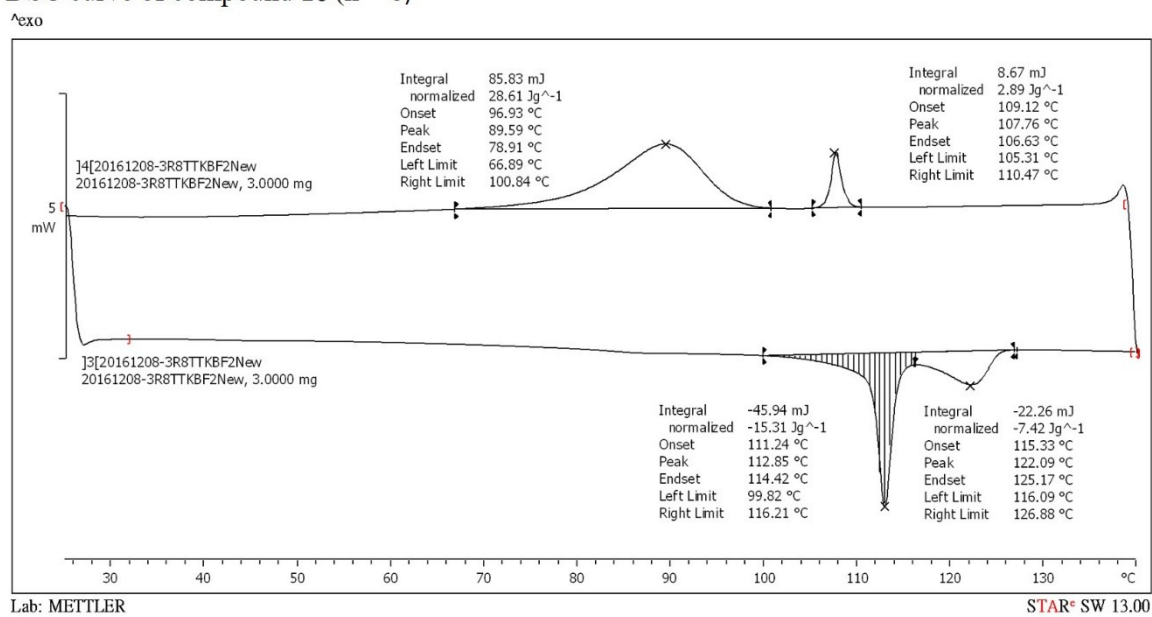

**Fig. S15** DSC thermograph of compound **1c** (n = 8).
